# Supplementary material for: End-of-life emergency medical service transport among patients with terminal cancer, by cardiopulmonary arrest status: A nationwide mortality follow-back survey
Source: Research Square preprint supplement (doi:10.21203/rs.3.rs-7250687/v1), 2025-10-12
Supplement: Supplementary file 1 [file bed357397e4e6d09fc5c2bbc.xlsx]

## Sheet: table 1
Table 1. Patient Characteristics and CPA Status at EMS Transport							1			0
			Total			Missing (N)	CPA			Non CPA			p
Characteristics			N	%	(95%CI)		N	%	(95%CI)	N	%	(95%CI)
Sample no.			4939				178	3.604	(3.1, 4.1)	4761	96.396	(95.9, 96.9)
Patients
	Age, ya, mean			77.2869	(77.0, 77.6)			75.8596	(74.3, 77.5)		77.3403	(77.0, 77.6)	0.0738
		20s to 50s	309	6.2563	(5.6, 6.9)		13	7.3	(3.5, 11.1)	296	6.22	(5.5, 6.9)	0.4962
		60s	802	16.2381	(15.2, 17.3)		35	19.66	(13.8, 25.5)	767	16.11	(15.1, 17.2)
		70s	1474	29.8441	(28.6, 31.1)		56	31.46	(24.6, 38.3)	1418	29.78	(28.5, 31.1)
		80s	1824	36.9306	(35.6, 38.3)		56	31.46	(24.6, 38.3)	1768	37.14	(35.8, 38.5)
		90s and above	530	10.7309	(9.9, 11.6)		18	10.11	(5.7, 14.5)	512	10.75	(9.9, 11.6)
	Sexa												0.7987
		Male	3258	65.9648	(64.6, 67.3)		119	66.85	(59.9, 73.8)	3139	65.93	(64.6, 67.3)
		Female	1681	34.0352	(32.7, 35.4)		59	33.15	(26.2, 40.1)	1622	34.07	(32.7, 35.4)
	Cancer typea												<.001
		Hepatobiliary & Pancreas	1084	21.9478	(20.8, 23.1)		25	14.04	(8.9, 19.2)	1059	22.24	(21.1, 23.4)
		Colorectal	620	12.5531	(11.6, 13.5)		10	5.62	(2.2, 9.0)	610	12.81	(11.9, 13.8)
		Female & Male Genitourinary	453	9.1719	(8.4, 10.0)		15	8.43	(4.3, 12.5)	438	9.2	(8.4, 10.0)
		Hematologic	355	7.1877	(6.5, 7.9)		12	6.74	(3.1, 10.4)	343	7.2	(6.5, 7.9)
		Breast	163	3.3003	(2.8, 3.8)		8	4.49	(1.4, 7.5)	155	3.26	(2.8, 3.8)
		Skin & CNS	46	0.9314	(0.7, 1.2)		5	2.81	(0.4, 5.2)	41	0.86	(0.6, 1.1)
		Head & Neck	97	1.964	(1.6, 2.4)		7	3.93	(1.1, 6.8)	90	1.89	(1.5, 2.3)
		Esophagogastric	715	14.4766	(13.5, 15.5)		30	16.85	(11.4, 22.4)	685	14.39	(13.4, 15.4)
		Lung	1088	22.0288	(20.9, 23.2)		53	29.78	(23.1, 36.5)	1035	21.74	(20.6, 22.9)
		Others	318	6.4386	(5.8, 7.1)		13	7.3	(3.5, 11.1)	305	6.41	(5.7, 7.1)
	Time from diagnosis to death					100							0.0683
		2-3M	735	15.1891	(14.2, 16.2)		16	9.14	(4.9, 13.4)	719	15.42	(14.4, 16.5)
		4-12M	1541	31.8454	(30.5, 33.2)		52	29.71	(22.9, 36.5)	1489	31.93	(30.6, 33.3)
		2-5Y	1865	38.541	(37.2, 39.9)		76	43.43	(36.1, 50.8)	1789	38.36	(37.0, 39.8)
		5Y more	698	14.4245	(13.4, 15.4)		31	17.71	(12.1, 23.4)	667	14.3	(13.3, 15.3)
	Functional status (ADLs)					50							0.0146
		Independent	1092	22.3359	(21.2, 23.5)		49	28	(21.3, 34.7)	1043	22.13	(20.9, 23.3)
		Partially	1931	39.4968	(38.1, 40.9)		77	44	(36.6, 51.4)	1854	39.33	(37.9, 40.7)
		Almost all	1866	38.1673	(36.8, 39.5)		49	28	(21.3, 34.7)	1817	38.54	(37.2, 39.9)
	History of dementia diagnosis		511	10.6325	(9.8, 11.5)	133	22	12.64	(7.7, 17.6)	489	10.56	(9.7, 11.4)	0.3807
	Lived with others		4363	89.6445	(88.8, 90.5)	72	166	93.26	(89.6, 96.9)	4197	89.51	(88.6, 90.4)	0.1069
	Household income, yen/y					790							0.1988
		<2 million	1390	33.502	(32.1, 34.9)		55	36.42	(28.7, 44.1)	1335	33.39	(31.9, 34.9)
		<4 million	1827	44.0347	(42.5, 45.5)		72	47.68	(39.7, 55.7)	1755	43.9	(42.4, 45.4)
		<6 million	648	15.6182	(14.5, 16.7)		19	12.58	(7.3, 17.9)	629	15.73	(14.6, 16.9)
		6 million above	284	6.845	(6.1, 7.6)		5	3.31	(0.5, 6.2)	279	6.98	(6.2, 7.8)
	Out-of-pocket expenses, yen/m					637							<.001
		<100,000	963	22.3849	(21.1, 23.6)		61	41.22	(33.3, 49.1)	902	21.71	(20.5, 23.0)
		<200,000	1498	34.821	(33.4, 36.2)		51	34.46	(26.8, 42.1)	1447	34.83	(33.4, 36.3)
		<400,000	1256	29.1957	(27.8, 30.6)		23	15.54	(9.7, 21.4)	1233	29.68	(28.3, 31.1)
		≥400,000	585	13.5983	(12.6, 14.6)		13	8.78	(4.2, 13.3)	572	13.77	(12.7, 14.8)
Respondants
	Relationship to the Patient					91							0.0706
		Spouse	2437	50.2682	(48.9, 51.7)		106	60.57	(53.3, 67.8)	2331	49.88	(48.4, 51.3)
		Child	1732	35.7261	(34.4, 37.1)		49	28	(21.3, 34.7)	1683	36.02	(34.6, 37.4)
		Child-in-law	350	7.2195	(6.5, 7.9)		8	4.57	(1.5, 7.7)	342	7.32	(6.6, 8.1)
		Parent	115	2.3721	(1.9, 2.8)		4	2.29	(0.1, 4.5)	111	2.38	(1.9, 2.8)
		Other	214	4.4142	(3.8, 5.0)		8	4.57	(1.5, 7.7)	206	4.41	(3.8, 5.0)
a Reaggregated using national vital statistics data
CPA, Cardiopulmonary Arrest
EMS, Emergency Medical Services
CNS, Central Nervous System
ADL, Activities of Daily Living
