# Supplementary material for: End-of-life emergency medical service transport among patients with terminal cancer, by cardiopulmonary arrest status: A nationwide mortality follow-back survey
Source: Research Square preprint supplement (doi:10.21203/rs.3.rs-7250687/v1), 2025-10-12
Supplement: Supplementary file 2 [file e1371a7fec458acfe5bb5b57.xlsx]

## Sheet: supple1
Supplementary Table 1. Absolute Differences in patient Characteristics According to CPA Status at EMS Transport
Characteristics			Dif.	(95%CI)
Patients
	Age, ya, mean		-1.48071	(-3.1, 0.1)
		20s to 50s	1.08	(-2.8, 5.0)
		60s	3.55	(-2.4, 9.5)
		70s	1.68	(-5.3, 8.6)
		80s	-5.68	(-12.6, 1.3)
		90s and above	-0.64	(-5.2, 3.9)
	Sexa
		Male	-0.92	(-8.0, 6.1)
		Female	0.92	(-6.1, 8.0)
	Cancer typea
		Hepatobiliary & Pancreas	-8.2	(-13.4, -3.0)
		Colorectal	-7.19	(-10.7, -3.7)
		Female & Male Genitourinary	-0.77	(-4.9, 3.4)
		Hematologic	-0.46	(-4.2, 3.3)
		Breast	1.23	(-1.9, 4.3)
		Skin & CNS	1.95	(-0.5, 4.4)
		Head & Neck	2.04	(-0.8, 4.9)
		Esophagogastric	2.46	(-3.1, 8.1)
		Lung	8.04	(1.2, 14.9)
		Others	0.89	(-3.0, 4.8)
	Time from diagnosis to death
		2-3M	-6.28	(-10.7, -1.9)
		4-12M	-2.22	(-9.1, 4.7)
		2-5Y	5.07	(-2.4, 12.5)
		5Y more	3.41	(-2.3, 9.2)
	Functional status (ADLs)
		Independent	5.87	(-0.9, 12.6)
		Partially	4.67	(-2.8, 12.2)
		Almost all	-10.54	(-17.3, -3.7)
	History of dementia diagnosis		2.08	(-2.9, 7.1)
	Lived with others		3.75	(0.0, 7.5)
	Household income, yen/y
		<2 million	3.03	(-4.8, 10.8)
		<4 million	3.78	(-4.3, 11.9)
		<6 million	-3.15	(-8.6, 2.3)
		6 million above	-3.67	(-6.6, -0.7)
	Out-of-pocket expenses, yen/m
		<100,000	19.51	(11.5, 27.5)
		<200,000	-0.37	(-8.2, 7.4)
		<400,000	-14.14	(-20.1, -8.1)
		≥400,000	-4.99	(-9.7, -0.3)
Respondants
	Relationship to the Patient
		Spouse	10.69	(3.3, 18.1)
		Child	-8.02	(-14.8, -1.2)
		Child-in-law	-2.75	(-5.9, 0.4)
		Parent	-0.09	(-2.3, 2.2)
		Other	0.16	(-3.0, 3.3)
Dif., Values represent absolute percentage-point differences between CPA and non-CPA groups.
a Reaggregated using national vital statistics data
CPA, Cardiopulmonary Arrest
EMS, Emergency Medical Services
CNS, Central Nervous System
ADL, Activities of Daily Living

## Sheet: supple2
Supplementary Table 2. End-of-Life Care and Experiences by CPA Status at EMS Transport								1			0
				Total			Missing (N)	CPA			Non CPA			Dif. (95%CI)
Indicater				N	%	(95%CI)		N	%	(95%CI)	N	%	(95%CI)
Patient EOL care and experiences
	EOL Care Utilization
		Home medical care use		1213	28.595	(27.2, 30.0)	697	49	31.61	(24.3, 38.9)	1164	28.48	(27.1, 29.9)	3.13	(-4.3, 10.6)
		Long-term care service use		2403	53.3881	(51.9, 54.8)	438	78	48.15	(40.5, 55.8)	2325	53.58	(52.1, 55.1)	-5.43	(-13.3, 2.4)
	EOL Discussions
		DNR status		2705	92.5736	(91.6, 93.5)	2017	38	55.88	(44.1, 67.7)	2667	93.45	(92.5, 94.4)	3.49	(-4.3, 11.3)
		Prognostic awareness (patient)		2468	58.5806	(57.1, 60.1)	726	96	61.94	(54.3, 69.6)	2372	58.45	(56.9, 60.0)	-37.57	(-49.4, -25.7)
		Resuscitation discussion (patient-physician)		1729	61.596	(59.8, 63.4)	2132	40	46.51	(36.0, 57.1)	1689	62.07	(60.2, 63.9)	-15.56	(-26.3, -4.9)
		EOL discussion (patient-family)		2013	50.4764	(48.9, 52.0)	951	51	39.53	(31.1, 48.0)	1962	50.84	(49.3, 52.4)	-11.31	(-19.9, -2.7)
	Quality of Care
		Quality of death, mean			43.879	(43.5, 44.2)			48.7476	(47.0, 50.5)		43.706	(43.3, 44.1)	5.04157	(3.3, 6.8)
		Quality of EOL care, mean			46.5413	(46.3, 46.8)			46.0769	(44.5, 47.7)		46.556	(46.3, 46.8)	-0.479071	(-2.1, 1.1)
		Family satisfaction with EOL care, mean			4.23077	(4.2, 4.3)			4.23899	(4.0, 4.4)		4.23047	(4.2, 4.3)	0.008523	(-0.2, 0.2)
	Symptom Burden
		Loss of appetite		2289	56.7849	(55.3, 58.3)	908	62	40.26	(32.5, 48.0)	2227	57.44	(55.9, 59.0)	-17.18	(-25.1, -9.3)
		Difficulty swallowing		1453	39.0486	(37.5, 40.6)	1218	34	24.11	(17.0, 31.2)	1419	39.64	(38.0, 41.2)	-15.53	(-22.8, -8.3)
		Drowsy		1379	34.8408	(33.4, 36.3)	981	32	23.02	(16.0, 30.0)	1347	35.27	(33.8, 36.8)	-12.25	(-19.4, -5.1)
		Lack of energy		1589	45.7925	(44.1, 47.5)	1469	48	36.36	(28.2, 44.6)	1541	46.17	(44.5, 47.9)	-9.81	(-18.2, -1.4)
		Nausea		534	14.3125	(13.2, 15.4)	1208	9	6.47	(2.4, 10.6)	525	14.62	(13.5, 15.8)	-8.15	(-12.4, -3.9)
		Pain		1480	38.3221	(36.8, 39.9)	1077	42	31.34	(23.5, 39.2)	1438	38.57	(37.0, 40.1)	-7.23	(-15.2, 0.8)
		Dyspnea		1510	38.4517	(36.9, 40.0)	1012	46	32.62	(24.9, 40.4)	1464	38.67	(37.1, 40.2)	-6.05	(-13.9, 1.8)
Family EOL Experiences
	Family Involvement in Care
		Attendance at bedside					102
			None	349	7.2152	(6.5, 7.9)		13	7.4713	(3.6, 11.4)	336	7.2057	(6.5, 7.9)	0.2656	(-3.7, 4.2)
			Sometimes	1198	24.7674	(23.6, 26.0)		22	12.6437	(7.7, 17.6)	1176	25.2198	(24.0, 26.5)	-12.5761	(-17.7, -7.5)
			Always	3290	68.0174	(66.7, 69.3)		139	79.8851	(73.9, 85.8)	3151	67.5745	(66.2, 68.9)	12.3106	(6.2, 18.4)
		Prognostic awareness (family)		3719	77.1417	(76.0, 78.3)	118	120	69.36	(62.5, 76.2)	3599	77.43	(76.2, 78.6)	-8.07	(-15.0, -1.1)
		Resuscitation discussion (family-physician)		2644	68.0041	(66.5, 69.5)	1051	53	41.73	(33.2, 50.3)	2591	68.89	(67.4, 70.4)	-27.16	(-35.9, -18.5)
	Family Outcomes and Burden
		Caregiver burden, mean			14.9338	(14.8, 15.1)			14.4691	(13.5, 15.4)		14.9506	(14.8, 15.1)	-0.481501	(-1.5, 0.5)
		Physical health: good		3855	79.3373	(78.2, 80.5)	80	140	80	(74.1, 85.9)	3715	79.31	(78.2, 80.5)	0.69	(-5.4, 6.7)
		Mental health: good		2848	58.6974	(57.3, 60.1)	87	116	66.67	(59.7, 73.7)	2732	58.4	(57.0, 59.8)	8.27	(1.1, 15.4)
		Depressive symptoms (bereaved)		1109	23.636	(22.4, 24.9)	247	43	26.22	(19.5, 33.0)	1066	23.54	(22.3, 24.8)	2.68	(-4.2, 9.5)
		Grief symptoms (bereaved)		1673	35.1323	(33.8, 36.5)	177	63	37.5	(30.2, 44.8)	1610	35.05	(33.7, 36.4)	2.45	(-5.0, 9.9)
Dif., Values represent absolute percentage-point differences between CPA and non-CPA groups.
CPA, Cardiopulmonary Arrest
EMS, Emergency Medical Services
DNR, Do Not Resuscitate
EOL, End of life
